# Supplementary material for: Sunny, Rainy, and Cloudy with a Chance of Mobile Promotion Effectiveness
Source: Atypon-hosted journal article supplement (doi:10.1287/mksc.2017.1044), 2017-06-20
Supplement: mksc.2017.1044-sm.pdf [file mksc.2017.1044-sm.pdf]

# Sunny, Rainy, and Cloudy with a Chance of Mobile Promotion Effectiveness

Chenxi LI, Xueming LUO, Cheng ZHANG, and Xiaoyi WANG

## Online Appendix A: Provinces and Cities

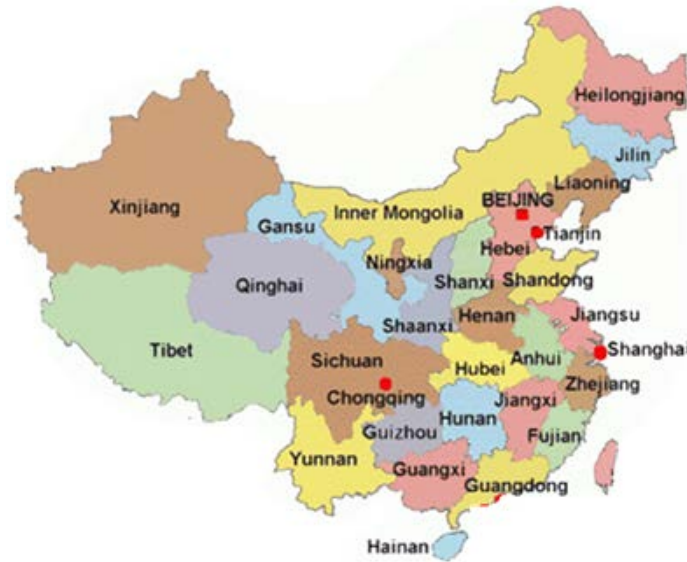

Robustness Check of City-Level Locational Effects

|                      | (1)               | (2)               | (3)               | (4)               |
|----------------------|-------------------|-------------------|-------------------|-------------------|
| <b>Sunny Weather</b> | <b>0.2555***</b>  | <b>0.1753***</b>  | <b>0.2999***</b>  | <b>0.2332***</b>  |
|                      | (0.010)           | (0.014)           | (0.011)           | (0.015)           |
| <b>Rainy Weather</b> | <b>-0.0534***</b> | <b>-0.1212***</b> | <b>-0.0507***</b> | <b>-0.1417***</b> |
|                      | (0.014)           | (0.017)           | (0.014)           | (0.017)           |
| Ad Copy Framing      |                   |                   | 0.1553***         | 0.4536***         |
|                      |                   |                   | (0.014)           | (0.020)           |
| Wind Power           |                   | -0.2141***        |                   | -0.2845***        |
|                      |                   | (0.023)           |                   | (0.024)           |
| Temperature          |                   | -0.0109***        |                   | -0.0591***        |
|                      |                   | (0.003)           |                   | (0.004)           |
| Temperature Range    |                   | 0.0315***         |                   | 0.0661***         |
|                      |                   | (0.003)           |                   | (0.004)           |
| Intercept            | -4.9502***        | -4.1559***        | -4.9514***        | -2.7294***        |
|                      | (0.092)           | (0.142)           | (0.092)           | (0.158)           |
| Wind Direction       | Yes               | Yes               | Yes               | Yes               |
| City Fixed Effect    | Yes               | Yes               | Yes               | Yes               |

### 344 city names

|                | Names of the Cities                                                                                                                                                                                   |
|----------------|-------------------------------------------------------------------------------------------------------------------------------------------------------------------------------------------------------|
| Urban<br>(167) | Anqing, Anyang, Anshan, Bengbu, Baotou, Baoji, Baoding, Beihai, Beijing, Benxi, Binzhou, Cangzhou, Changde, Changzhou, Chaozhou, Chenzhou, Chengdu, Chifeng, Chuzhou, Dalian, Daqing, Datong, Deyang, |

---

Dezhou, Dongguan, Dongying, Erdos, Foshan, Fuzhou, Fushun, Ganzhou, Guangzhou, Guiyang, Guilin, Harbin, Haikou, Handan, Hangzhou, Hefei, Hengyang, Hohhot, Hulunbuir, Huzhou, Huaian, Huainan, Huanggang, Huangshi, Huizhou, Jixi, Jilin, Jinan, Jining, Jiamusi, Jiaying, Jiangmen, Jiaozuo, Jinhua, Jingmen, Jingzhou, Jiujiang, Kaifeng, Karamay, Kunming, Lhasa, Lanzhou, Langfang, Leshan, Lianyungang, Liangshan, Liaocheng, Linfen, Linyi, Liuzhou, Longyan, Loudi, Luzhou, Luoyang, Luliang, Ma'anshan, Maoming, Mianyang, Nanchang, Nanchong, Nanjing, Nanning, Nantong, Nanyang, Ningbo, Panjin, Pingdingshan, Putian, Qigihar, Qinhuangdao, Qingdao, Qingyuan, Quanzhou, Rizhao, Xiamen, Shantou, Shanghai, Shangrao, Shaoxing, Shenzhen, Shenyang, Shihezi, Shijiazhuang, Siping, Songyuan, Suzhou, Taizhou, Taiyuan, Taian, Taizhou, Tangshan, Tianjin, Tongliao, Tongling, Weihai, Weifang, Weinan, Wenzhou, Wuhai, Urumqi, Wuxi, Wuhu, Wuzhou, Wuhan, Xi'an, Xining, Xianyang, Xiangtan, Xiaogan, Xinxiang, Xinyu, Xingtai, Xuzhou, Xuchang, Yantai, Yanan, Yancheng, Yangzhou, Yangquan, Yibin, Yichang, Yichun, Yinchuan, Yingkou, Yulin., Yulin, Yueyang, Yuncheng, Zhanjiang, Zhangjiakou, Zhangzhou, Changchun, Changsha, Changzhi, Zhaoqing, Zhenjiang, Zhengzhou, Zhongshan, Chongqing, Zhoushan, Zhuhai, Zhuzhou, Zibo, Zigong

Rural (177) Aba, Aksu, Alashan, Aletai, Ali, Atushi, Ankang, Anshun, Bayinnaer, Bayinguoleng, Bazhong, Baicheng, Baishan, Baiyin, Baise, Baoshan, Bijie, Bozhou, BoLe, Changdu, Changji, Chaohu, Chaoyang, Chengde, Chizhou, Chuxiong, Dazhou, Dali, Greater Hinggan Mountains, Dandong, Dehong, Delingha, Dingxi, Douyun, Ezhou, Enshi, Fangchenggang, Fuzhou, Fuxin, Fuyang, Gannan, Ganzi, Golmud, Gejiu, Gonghe, Guyuan, Guangan, Guangyuan, Guichi, Guoluo, Hami, Haibeizhou, Haidong, Hainanzhou, Hanzhong, Haozhou, Hetian, Hechi, Heyuan, Heze, Hebi, Hegang, Heihe, Hengshui, Huludao, Huaihua, Huaibei, Huaiyin, huangnan, Huangshan, Hunchun, Gi'an, Jishou, Jieyang, Jinchang, Jinzhou, Jincheng, Jinzhong, Jingdezhen, Jinghong, Jiuquan, Kashgar, Kaili, Kuytun, Laiwu, Lijiang, Lishui, Liaoyang, Liaoyuan, Linzhi, Lincang, Linxia, Lu'an, Liupanshui, Longnan, Luohe, Barkam, Maqin, Meishan, Meihekou, Meizhou, Mudanjiang, Naqu, Nanping, Neijiang, Ningde, Panzhihua, Pingliang, Pingxiang, Puyang, Pu'er, Qitaihe, Qinzhou, Qingyang, Quzhou, Qujing, Shigatse, Sanmenxia, Sanming, Shannan, Shanwei, Shangluo, Shangqiu, Shaoguan, Shaoyang, Shiyan, Shizuishang, Shuangyashan, Shuozhou, Simao, Suihua, Suizhou, Suining, Tacheng, Tianshui, Tieling, Tonghua, Tongren, Tongchuan, Tongren, Turpan, Wenshan, Wulanchabu, Ulanhot, Wuzhong, Wuwei, Xilingol, Xilinhot, Xiantao, Xianning, Shangri-la, Xiangfan, Xinzhou, Xinyang, Xingyi, Suqian, Suzhou, Xuancheng, Ya'an, Yangjiang, Yichun, Yili, Yiyang, Yingtan, Yongzhou, Yushu, Yuxi, Yunfu, Zaozhuang, Zhangjiajie, Zhangye, Zhaotong, Zhongwei, Zhoukou, Zhumadian, Ziyang, Zunyi

---

## Appendix B: Additional Results on Sunny Conditions

Also, the results in below table panel A suggest that the coefficients of *Allsunny* ( $coef.=0.3525$ ) and *Partialsunny* ( $coef.=0.1246$ ) are both positive and significant ( $p<0.05$ ). Column (4) to (6) report the interaction effects. Again, results support negative interaction of *Allsunny\*Prevention framing* ( $coef.=-0.3222$ ,  $p<0.05$ ) and *Partialsunny\*Prevention framing* ( $coef.= -0.2148$ ,  $p<0.05$ ), as expected. We also test the effect with sunlight hour of the day, which is a continuous variable of sunshine. Results in Table 9 Panel B confirm that that longer sunlight hours indeed induce higher purchase likelihood, thus lending more evidence for the sunny weather effects. Also, column 2 indicates a negative interaction effect of sunlight hour and prevention framing ad copy, as expected.

Panel A: All versus Partial Sunny Weather

|                              | Full                        | All Sunny                   | Partial Sunny              | Full                         | All Sunny                    | Partial Sunny               |
|------------------------------|-----------------------------|-----------------------------|----------------------------|------------------------------|------------------------------|-----------------------------|
| <b>All Sunny</b>             | <b>0.3525***</b><br>(0.025) | <b>0.3802***</b><br>(0.027) |                            | <b>0.4395***</b><br>(0.029)  | <b>0.4437***</b><br>(0.030)  |                             |
| <b>Partial Sunny</b>         | <b>0.1246***</b><br>(0.027) |                             | <b>0.1011**</b><br>(0.031) | <b>0.2277***</b><br>(0.037)  |                              | <b>0.1690***</b><br>(0.043) |
| <b>All Sunny*Framing</b>     |                             |                             |                            | <b>-0.3222***</b><br>(0.057) | <b>-0.3470***</b><br>(0.068) |                             |
| <b>Partial Sunny*Framing</b> |                             |                             |                            | <b>-0.2148***</b><br>(0.055) |                              | <b>-0.1437*</b><br>(0.064)  |
| Ad Copy Framing              | 0.9063***<br>(0.061)        | 0.9084***<br>(0.063)        | 0.9849***<br>(0.064)       | 0.9486***<br>(0.061)         | 0.9293***<br>(0.063)         | 0.9982***<br>(0.065)        |
| Intercept                    | -6.3116*<br>(2.894)         | -5.1314<br>(3.011)          | 1.4245<br>(3.609)          | -5.3680<br>(2.896)           | -3.6118<br>(3.016)           | 1.5646<br>(3.607)           |
| Weather Covariates           | Yes                         | Yes                         | Yes                        | Yes                          | Yes                          | Yes                         |
| Location Fixed Effect        | Yes                         | Yes                         | Yes                        | Yes                          | Yes                          | Yes                         |
| Day Fixed Effect             | Yes                         | Yes                         | Yes                        | Yes                          | Yes                          | Yes                         |

Panel B: Sunlight Hours

|                                       | (1)                         | (2)                         |
|---------------------------------------|-----------------------------|-----------------------------|
| <b>Sunlight Hours</b>                 | <b>0.0965***</b><br>(0.019) | <b>0.0567***</b><br>(0.009) |
| <b>Sunlight Hours*Ad Copy Framing</b> |                             | <b>-0.0878*</b><br>(0.036)  |
| Ad Copy Framing                       | 4.0140***<br>(0.775)        | 2.0679***<br>(0.332)        |
| Intercept                             | 48.6490*<br>(24.136)        | -3.5628***<br>(0.763)       |
| Weather Covariates                    | Yes                         | Yes                         |
| Location Fixed Effect                 | Yes                         | Yes                         |
| Day Fixed Effect                      | Yes                         | Yes                         |

Note: logistic regression coefficient.  $^ap < 0.1$ ,  $^*p < 0.05$ ,  $^{**}p < 0.01$ ,  $^{***}p < 0.001$
